# Supplementary material
Source: PubMed Central journal article supplement (PMC4884518)

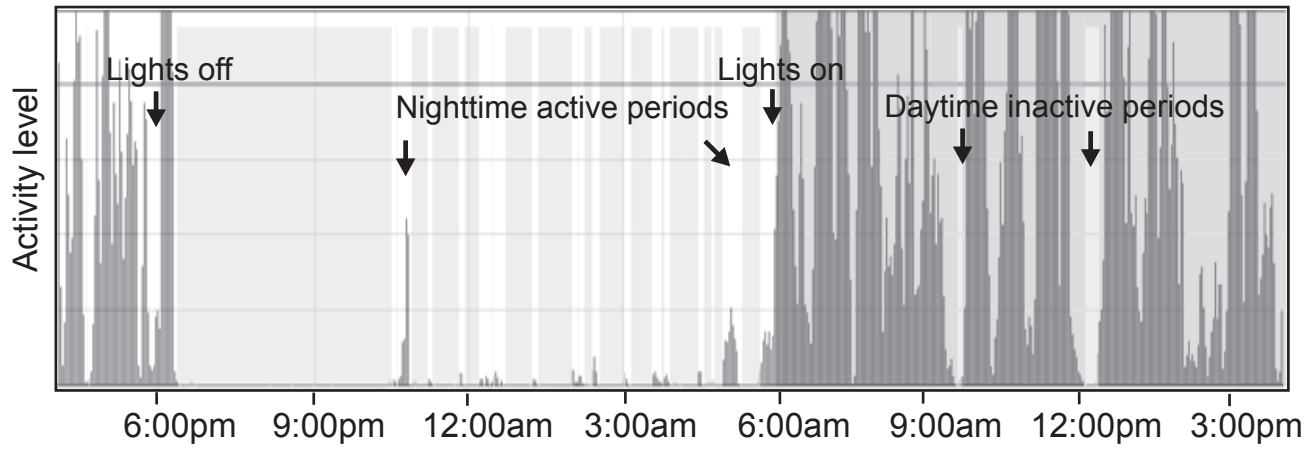

Supplemental Figure 1. Illustration of actigram.

Supplement: NIHMS768483-supplement-1.pdf [file NIHMS768483-supplement-1.pdf]
